# Supplementary material
Source: PubMed Central journal article supplement (PMC4505479)
Supplement: supp_M115.643700_jbc.M115.643700-1.pdf [file supp_M115.643700_jbc.M115.643700-1.pdf]

# Mapping the interaction of B Cell Leukaemia 3 (Bcl-3) and Nuclear Factor $\kappa$ B (NF- $\kappa$ B) p50 identifies a Bcl-3-mimetic anti-inflammatory peptide

Patricia E. Collins<sup>1</sup>, Gianluca Grassia<sup>1</sup>, Amy Colleran<sup>3</sup>, Patrick A. Kiely<sup>2</sup>, Armando Ialenti<sup>4</sup>, Pasquale Maffia<sup>1,4</sup> and Ruaidhrí J. Carmody<sup>1\*</sup>

**Supplementary table 1.** The 18 amino acids of the Bcl-3 derived peptides 2, 5, 6, 35, 36, 75, 78, 80, 85 and 87 were sequentially substituted with alanine. Arrays were probed with GST-p50 and detected by immunoblotting with anti-GST antibody. GST-p50 binding was quantified by densitometry and represented as a percentage binding of the control parent peptide peptides.

| Peptide 2 Intensity | Percent Binding | A.A Sub |
|---------------------|-----------------|---------|
| 0.268               | 100             | _       |
| 0.228               | 85.07463        | P       |
| 0.328               | 122.3881        | A       |
| 0.308               | 114.9254        | G       |
| 0.438               | 163.4328        | A       |
| 0.428               | 159.7015        | M       |
| 0.438               | 163.4328        | D       |
| 0.408               | 152.2388        | E       |
| 0.528               | 197.0149        | G       |
| 0.498               | 185.8209        | P       |
| 0.638               | 238.0597        | V       |
| 1.038               | 387.3134        | D       |
| 0.618               | 230.597         | L       |
| 0.158               | 58.95522        | R       |
| 0.448               | 167.1642        | T       |
| 0.148               | 55.22388        | R       |
| 0.578               | 215.6716        | P       |
| 0.058               | 21.64179        | K       |
| 0.458               | 170.8955        | G       |

| Peptide 5 Intensity | Percent Binding | A.A Sub |
|---------------------|-----------------|---------|
| 0.648               | 100             | _       |
| 0.638               | 98.45679        | R       |
| 0.768               | 118.5185        | T       |
| 0.738               | 113.8889        | R       |
| 0.628               | 96.91358        | P       |
| 0.548               | 84.5679         | K       |
| 0.648               | 100             | G       |
| 0.488               | 75.30864        | T       |
| 0.608               | 93.82716        | P       |
| 0.548               | 84.5679         | G       |
| 0.258               | 39.81481        | A       |
| 0.298               | 45.98765        | A       |
| 0.358               | 55.24691        | L       |
| 0.558               | 86.11111        | P       |
| 0.488               | 75.30864        | L       |
| 0.438               | 67.59259        | R       |
| 0.498               | 76.85185        | K       |
| 0.438               | 67.59259        | R       |
| 1.348               | 208.0247        | P       |

| Peptide 6 Intensity | Percent Binding | A.A Sub |
|---------------------|-----------------|---------|
| 0.948               | 100             | _       |
| 1.028               | 108.4388        | K       |
| 0.918               | 96.83544        | G       |
| 0.778               | 82.06751        | T       |
| 0.648               | 68.35443        | P       |
| 0.678               | 71.51899        | G       |
| 0.668               | 70.46414        | A       |
| 0.538               | 56.75105        | A       |
| 0.828               | 87.34177        | L       |
| 0.878               | 92.61603        | P       |
| 0.488               | 51.47679        | L       |
| 0.548               | 57.80591        | R       |
| 0.678               | 71.51899        | K       |
| 0.538               | 56.75105        | R       |
| 0.778               | 82.06751        | P       |
| 0.458               | 48.31224        | L       |
| 0.448               | 47.25738        | R       |
| 0.598               | 63.08017        | P       |
| 0.408               | 43.03797        | A       |

| Peptide 35 Intensity | Percent Binding | A.A Sub |
|----------------------|-----------------|---------|
| 1.858                | 100             | _       |
| 1.308                | 70.39828        | A       |
| 1.908                | 102.6911        | V       |
| 1.498                | 80.62433        | V       |
| 1.428                | 76.85684        | Q       |
| 1.828                | 98.38536        | N       |
| 1.598                | 86.00646        | N       |
| 1.418                | 76.31862        | I       |
| 1.038                | 55.86652        | A       |
| 1.118                | 60.17223        | A       |
| 0.778                | 41.87298        | V       |
| 0.668                | 35.95264        | Y       |
| 0.988                | 53.17546        | R       |
| 1.468                | 79.00969        | I       |
| 1.508                | 81.16254        | L       |
| 1.418                | 76.31862        | S       |
| 1.458                | 78.47147        | L       |
| 0.908                | 48.86975        | F       |
| 0.168                | 9.041981        | K       |

| Peptide 36 Intensity | Percent Binding | A.A Sub |
|----------------------|-----------------|---------|
| 1.818                | 100             | _       |
| 1.428                | 78.54785        | N       |
| 1.308                | 71.94719        | N       |
| 1.588                | 87.34873        | I       |
| 1.168                | 64.24642        | A       |
| 1.708                | 93.94939        | A       |
| 1.758                | 96.69967        | V       |
| 1.588                | 87.34873        | Y       |
| 1.788                | 98.34983        | R       |
| 1.898                | 104.4004        | I       |
| 1.738                | 95.59956        | L       |
| 1.478                | 81.29813        | S       |
| 1.218                | 66.9967         | L       |
| 1.378                | 75.79758        | F       |
| 0.798                | 43.89439        | K       |
| 1.578                | 86.79868        | L       |
| 1.378                | 75.79758        | G       |
| 1.188                | 65.34653        | S       |
| 0.518                | 28.49285        | R       |

| Peptide 75 Intensity | Percent Binding | A.A Sub |
|----------------------|-----------------|---------|
| 1.098                | 100             | _       |
| 0.888                | 80.87432        | V       |
| 0.738                | 67.21311        | N       |
| 0.638                | 58.10565        | A       |
| 0.898                | 81.78506        | Q       |
| 0.888                | 80.87432        | M       |
| 0.628                | 57.1949         | Y       |
| 0.708                | 64.48087        | S       |
| 0.648                | 59.01639        | G       |
| 0.528                | 48.08743        | S       |
| 0.378                | 34.42623        | S       |
| 0.078                | 7.103825        | A       |
| 0.438                | 39.89071        | L       |
| 0.608                | 55.37341        | H       |
| 0.438                | 39.89071        | S       |
| 0.078                | 7.103825        | A       |
| 0.598                | 54.46266        | S       |
| 0.568                | 51.73042        | G       |
| 0.068                | 6.193078        | R       |

| Peptide 78 Intensity | Percent Binding | A.A Sub |
|----------------------|-----------------|---------|
| 0.778                | 100             | _       |
| 0.838                | 107.7121        | H       |
| 0.818                | 105.1414        | S       |
| 0.698                | 89.71722        | A       |
| 0.728                | 93.57326        | S       |
| 0.958                | 123.1362        | G       |
| 0.768                | 98.71465        | R       |
| 0.678                | 87.14653        | G       |
| 1.188                | 152.6992        | L       |
| 1.118                | 143.7018        | L       |
| 0.798                | 102.5707        | P       |
| 1.178                | 151.4139        | L       |
| 1.148                | 147.5578        | V       |
| 0.258                | 33.16195        | R       |
| 0.818                | 105.1414        | T       |
| 0.918                | 117.9949        | L       |
| 0.868                | 111.5681        | V       |
| 0.218                | 28.02057        | R       |
| 0.648                | 83.29049        | S       |

| Peptide 80 Intensity | Percent Binding | A.A Sub |
|----------------------|-----------------|---------|
| 0.298                | 100             | _       |
| 0.238                | 79.86577        | L       |
| 0.308                | 103.3557        | P       |
| 0.378                | 126.8456        | L       |
| 0.408                | 136.9128        | V       |
| 0.318                | 106.7114        | R       |
| 0.348                | 116.7785        | T       |
| 0.318                | 106.7114        | L       |
| 0.428                | 143.6242        | V       |
| 0.068                | 22.81879        | R       |
| 0.668                | 224.1611        | S       |
| 0.528                | 177.1812        | G       |
| 0.138                | 46.30872        | A       |
| 0.558                | 187.2483        | D       |
| 0.538                | 180.5369        | S       |
| 0.548                | 183.8926        | G       |
| 0.558                | 187.2483        | L       |
| 0.088                | 29.5302         | K       |
| 0.558                | 187.2483        | N       |

| Peptide 85 Intensity | Percent Binding | A.A Sub |
|----------------------|-----------------|---------|
| 0.928                | 100             | _       |
| 0.688                | 74.13793        | N       |
| 0.858                | 92.4569         | D       |
| 0.638                | 68.75           | T       |
| 0.618                | 66.59483        | P       |
| 0.718                | 77.37069        | L       |
| 0.568                | 61.2069         | M       |
| 0.568                | 61.2069         | V       |
| 0.578                | 62.28448        | A       |
| 0.508                | 54.74138        | R       |
| 0.398                | 42.88793        | S       |
| 0.298                | 32.11207        | R       |
| 0.298                | 32.11207        | R       |
| 0.648                | 69.82759        | V       |
| 0.538                | 57.97414        | I       |
| 0.958                | 103.2328        | D       |
| 0.628                | 67.67241        | I       |
| 0.628                | 67.67241        | L       |
| 0.198                | 21.33621        | R       |

| Peptide 87 Intensity | Percent Binding | A.A Sub |
|----------------------|-----------------|---------|
| 0.928                | 100             | _       |
| 0.778                | 83.83621        | R       |
| 0.728                | 78.44828        | S       |
| 0.618                | 66.59483        | R       |
| 0.538                | 57.97414        | R       |
| 0.708                | 76.2931         | V       |
| 0.708                | 76.2931         | I       |
| 0.888                | 95.68966        | D       |
| 0.848                | 91.37931        | I       |
| 0.768                | 82.75862        | L       |
| 0.668                | 71.98276        | R       |
| 0.878                | 94.61207        | G       |
| 0.758                | 81.68103        | K       |
| 0.678                | 73.06034        | A       |
| 0.748                | 80.60345        | S       |
| 0.608                | 65.51724        | R       |
| 0.588                | 63.36207        | A       |
| 0.408                | 43.96552        | A       |
| 0.698                | 75.21552        | S       |
